# Supplementary material for: Bis(1-pyrenylmethyl)-2-benzyl-2-methyl-malonate as a Cu2+ Ion-Selective Fluoroionophore
Source: MDPI journal article supplement (doi:10.3390/molecules22091415), 2017-08-25
Supplement: s1 [file s1]

## Supplementary Material

### Bis(1-pyrenylmethyl)-2-benzyl-2-methyl-malonate as a $\text{Cu}^{2+}$ ion-selective Fluoroionophore

Takayo Moriuchi-Kawakami<sup>1,\*</sup>, Youji Hisada<sup>1</sup>, Akihisa Higashikado<sup>1</sup>, Tsubasa Inoue<sup>1</sup>, Keiichi Fujimori<sup>1</sup>, Toshiyuki Moriuchi<sup>2</sup>

<sup>1</sup>Department of Applied Chemistry, Faculty of Engineering, Osaka Institute of Technology, 5-16-1 Omiya, Asahi, Osaka 535-8585, Japan

<sup>2</sup>Department of Applied Chemistry, Graduate School of Engineering, Osaka University, 2-1, Suita Yamada-oka, Osaka 565-0871, Japan

#### 1. Fluorescence Response of bispyrenyl malonate 1.

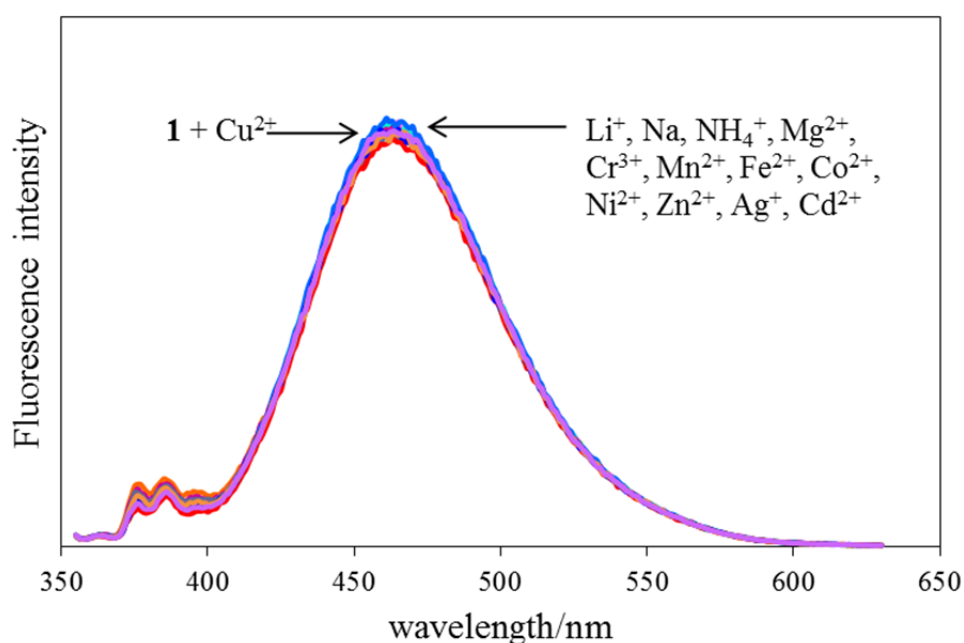

**Fig. S1** Fluorescence spectra of bispyrenyl malonate **1** (10  $\mu\text{M}$ ) mixed with 1 equiv. of the  $\text{Cu}^{2+}$  ions were changed in the presence of 1 equiv. of  $\text{Li}^+$ ,  $\text{Na}^+$ ,  $\text{NH}_4^+$ ,  $\text{Mg}^{2+}$ ,  $\text{Cr}^{3+}$ ,  $\text{Co}^{2+}$ ,  $\text{Ni}^{2+}$ ,  $\text{Cu}^{2+}$ ,  $\text{Zn}^{2+}$ ,  $\text{Ag}^+$ , and  $\text{Cd}^{2+}$  in acetonitrile/chloroform (9:1,  $v/v$ ) (excitation wavelength:  $\lambda_{\text{ex}} = 344 \text{ nm}$ ).

## 2. Fluorescence Response of bispyrenyl malonate **2**.

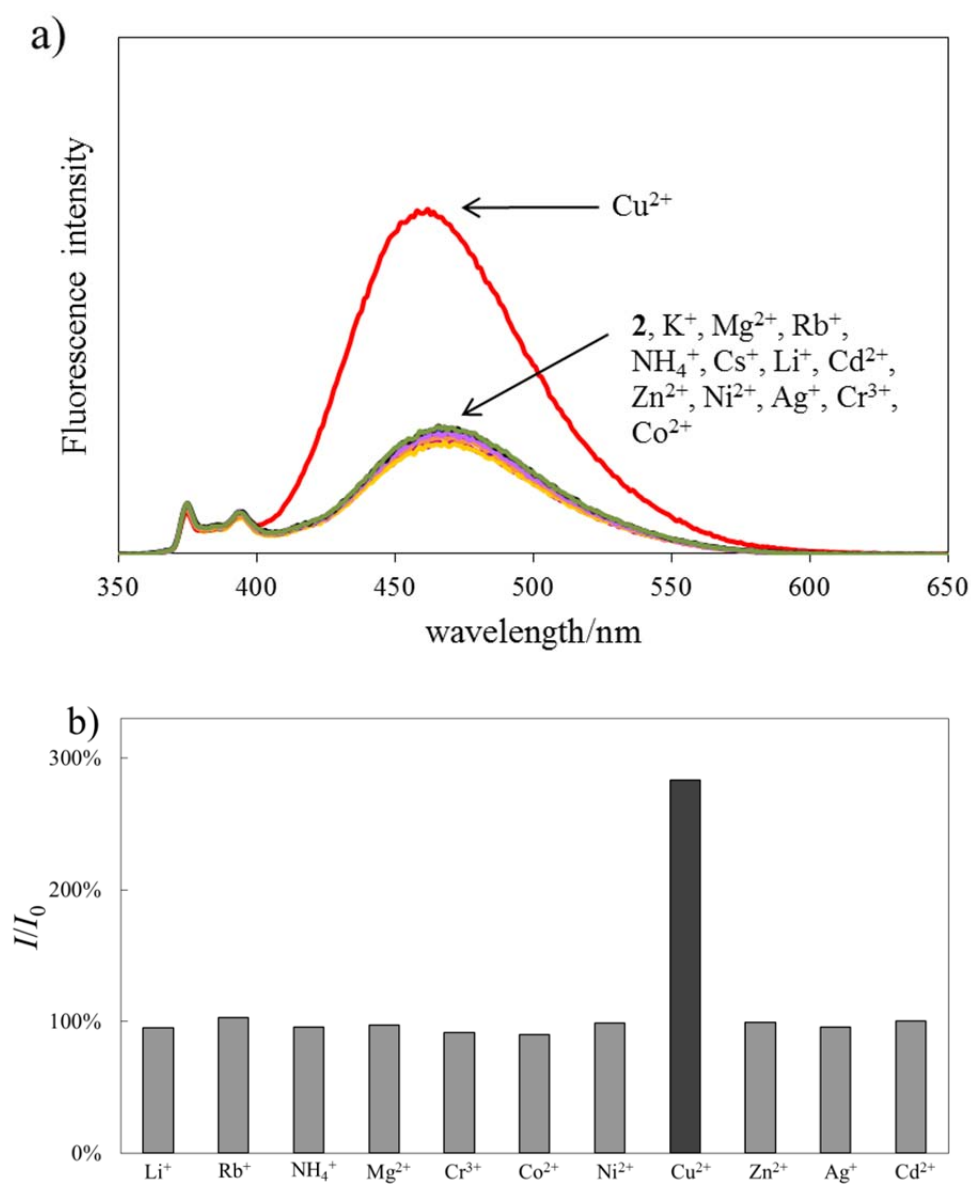

**Fig. S2** (a) Fluorescence spectra and (b) ratio of the fluorescence intensities monitored at 464 nm of bispyrenyl malonate **2** (10  $\mu\text{M}$ ) in the presence of 1 equiv. of  $\text{Li}^+$ ,  $\text{Rb}^+$ ,  $\text{NH}_4^+$ ,  $\text{Mg}^{2+}$ ,  $\text{Cr}^{3+}$ ,  $\text{Co}^{2+}$ ,  $\text{Ni}^{2+}$ ,  $\text{Cu}^{2+}$ ,  $\text{Zn}^{2+}$ ,  $\text{Ag}^+$ , and  $\text{Cd}^{2+}$  in acetonitrile/chloroform (9:1,  $v/v$ ) (excitation wavelength:  $\lambda_{\text{ex}} = 344 \text{ nm}$ ).

### 3. Spectral data of bispyrenyl malonate 1.

a)

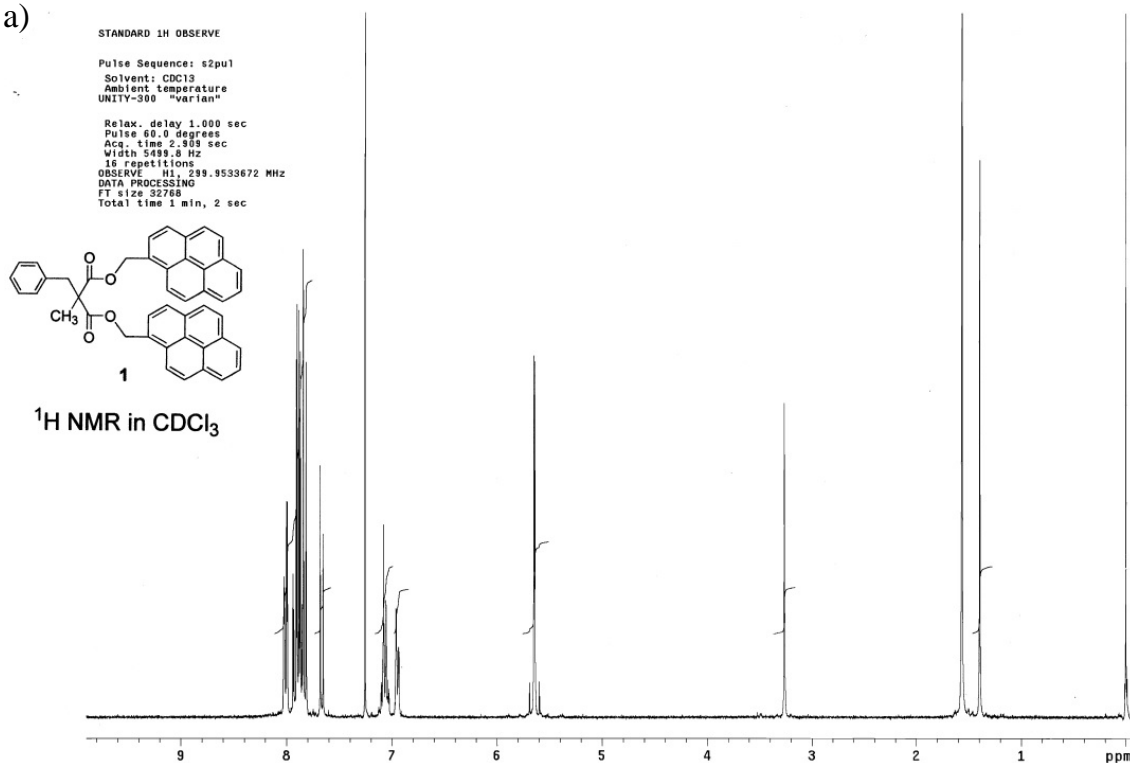

b)

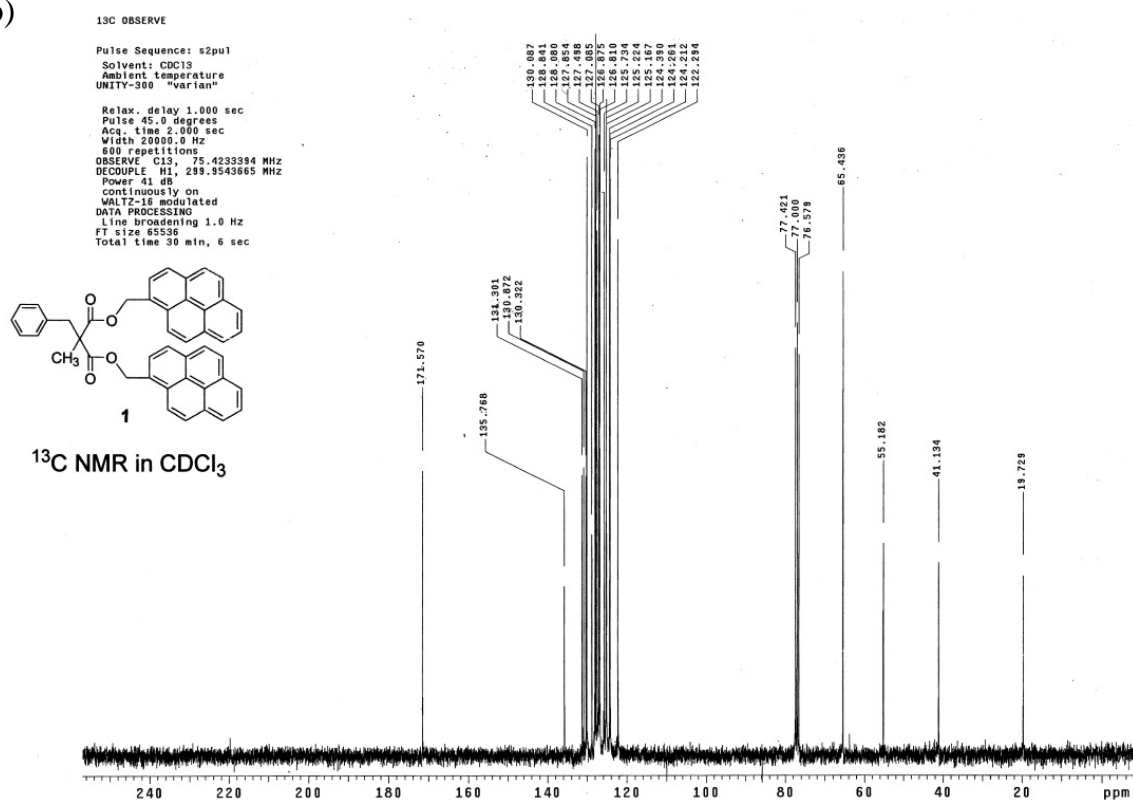

c)

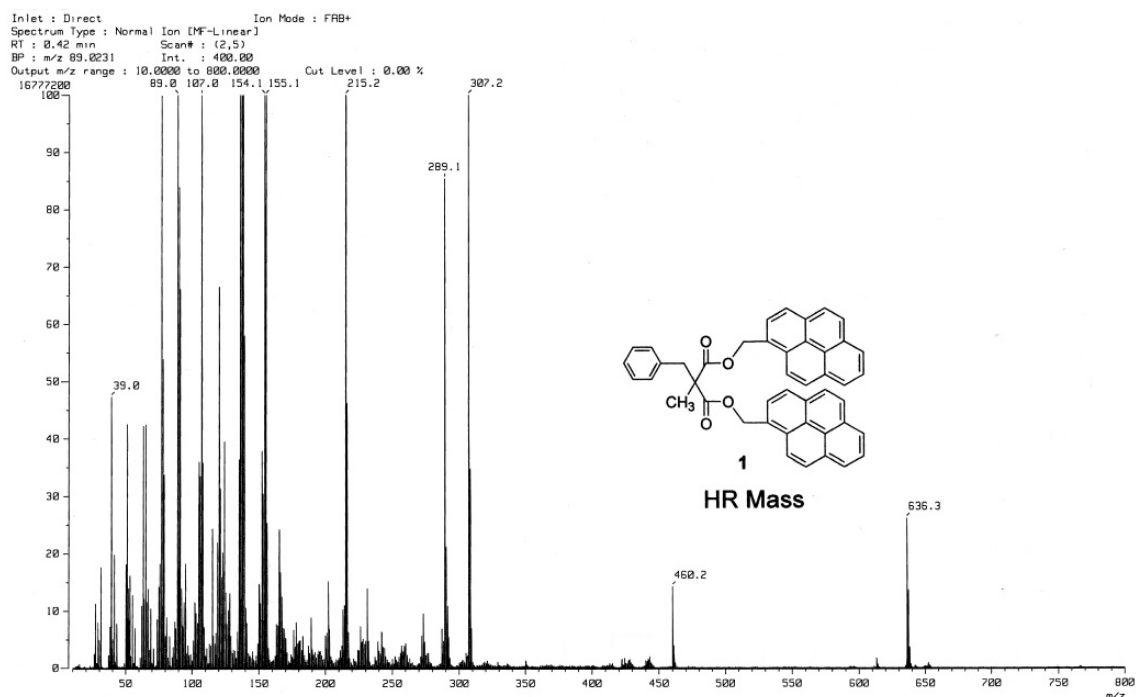

d)

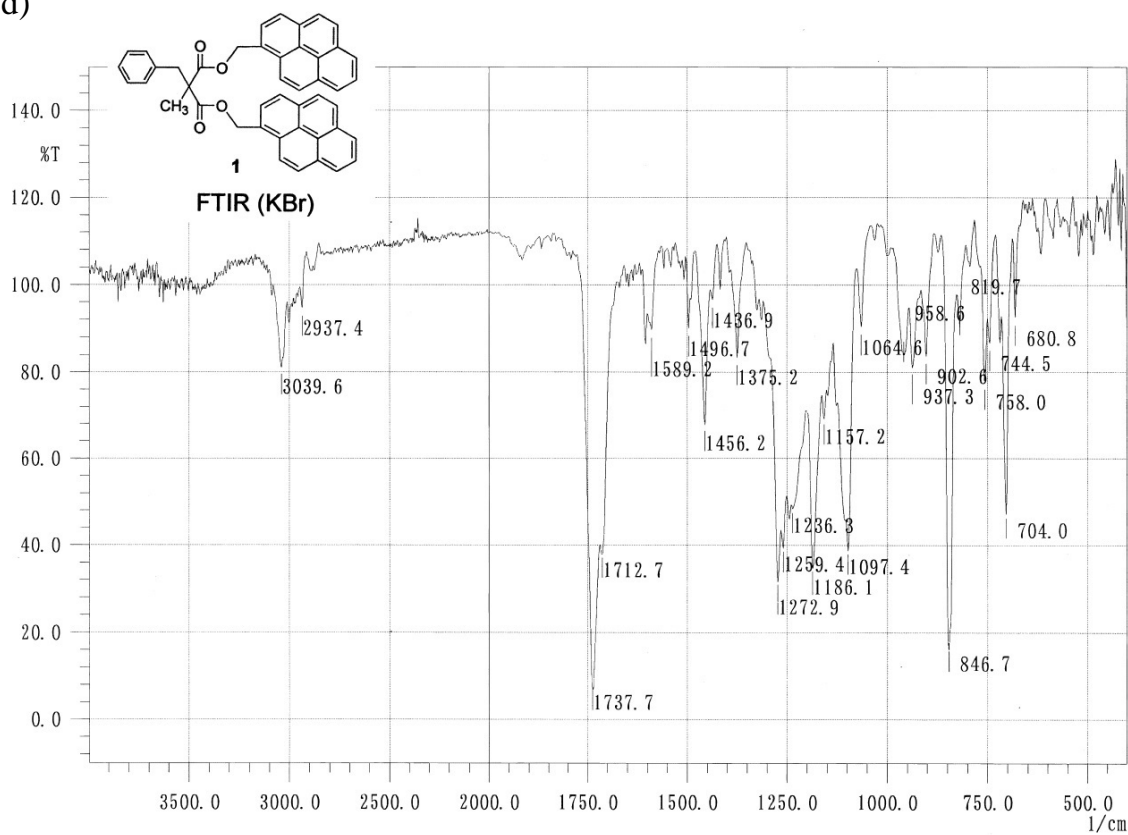

**Fig. S3** (a)  $^1\text{H}$  NMR and (b)  $^{13}\text{C}$  NMR spectra, (c) HRMS and (d) FT IR of bispyrenyl malonate **1**.

#### 4. Spectral data of bispyrenyl malonate **2**.

a)

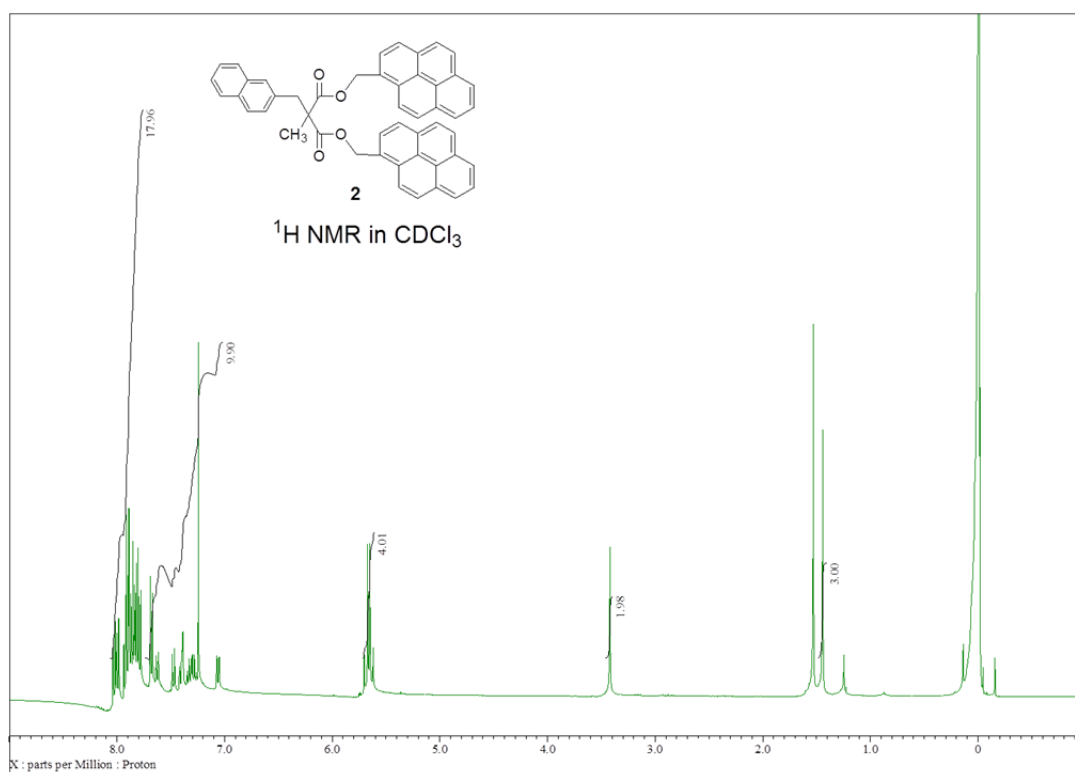

b)

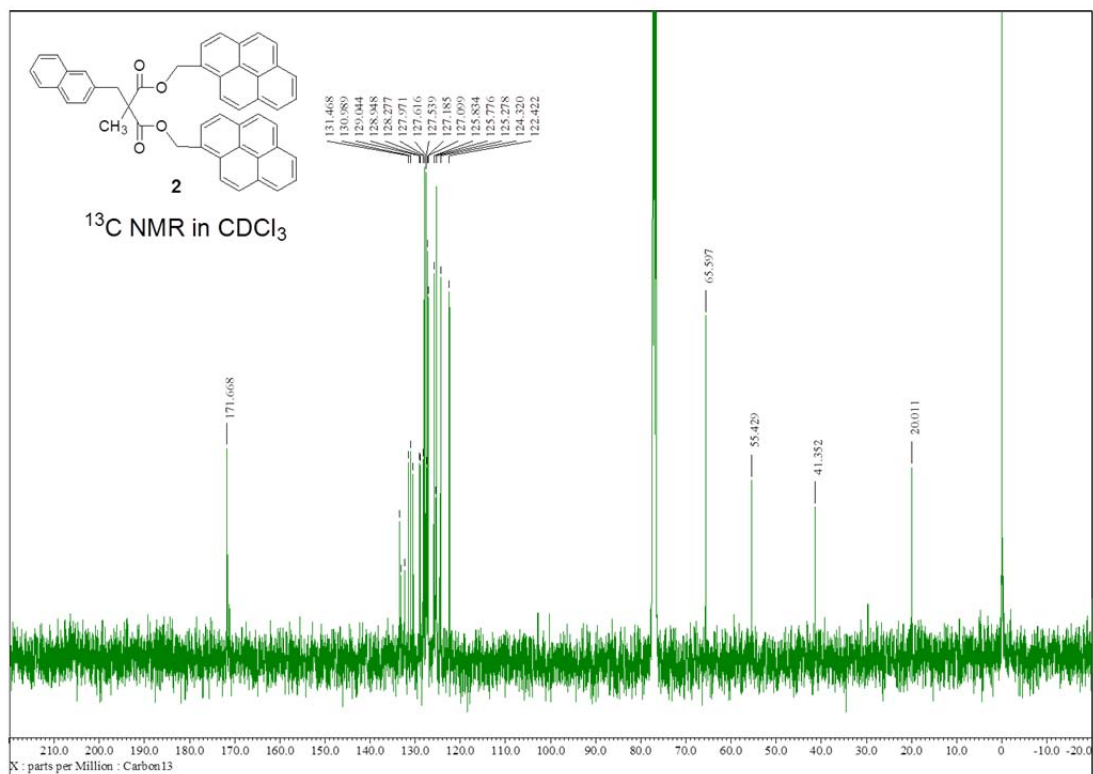

c)

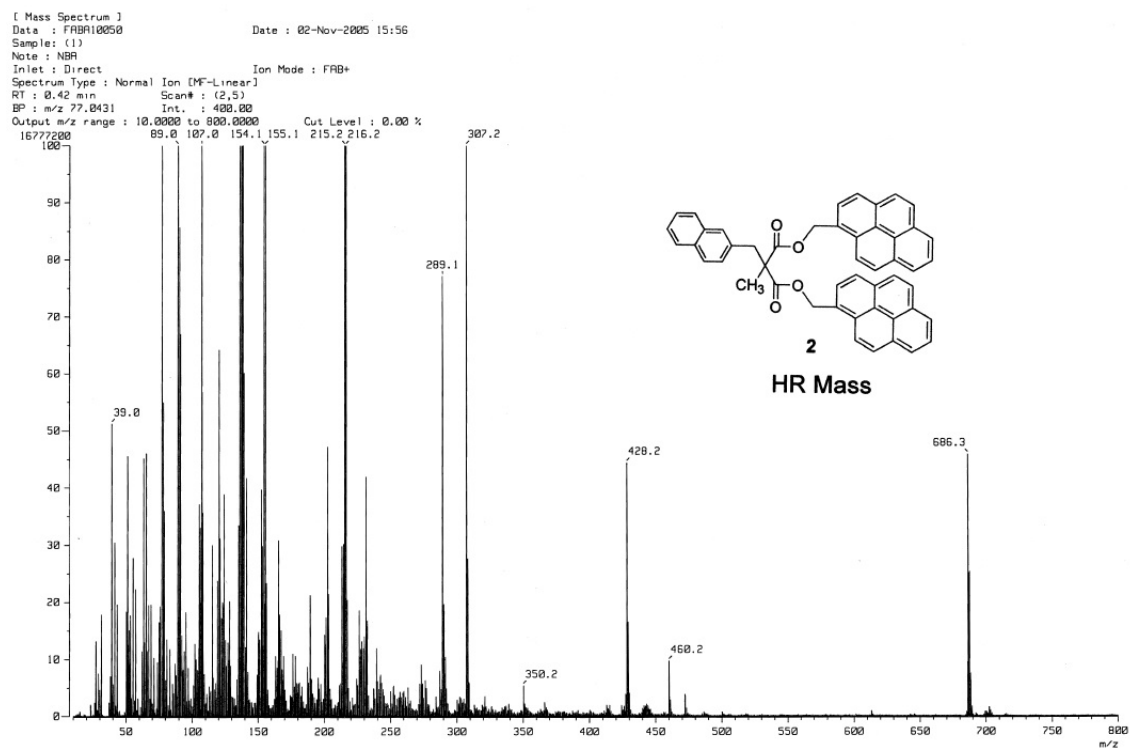

d)

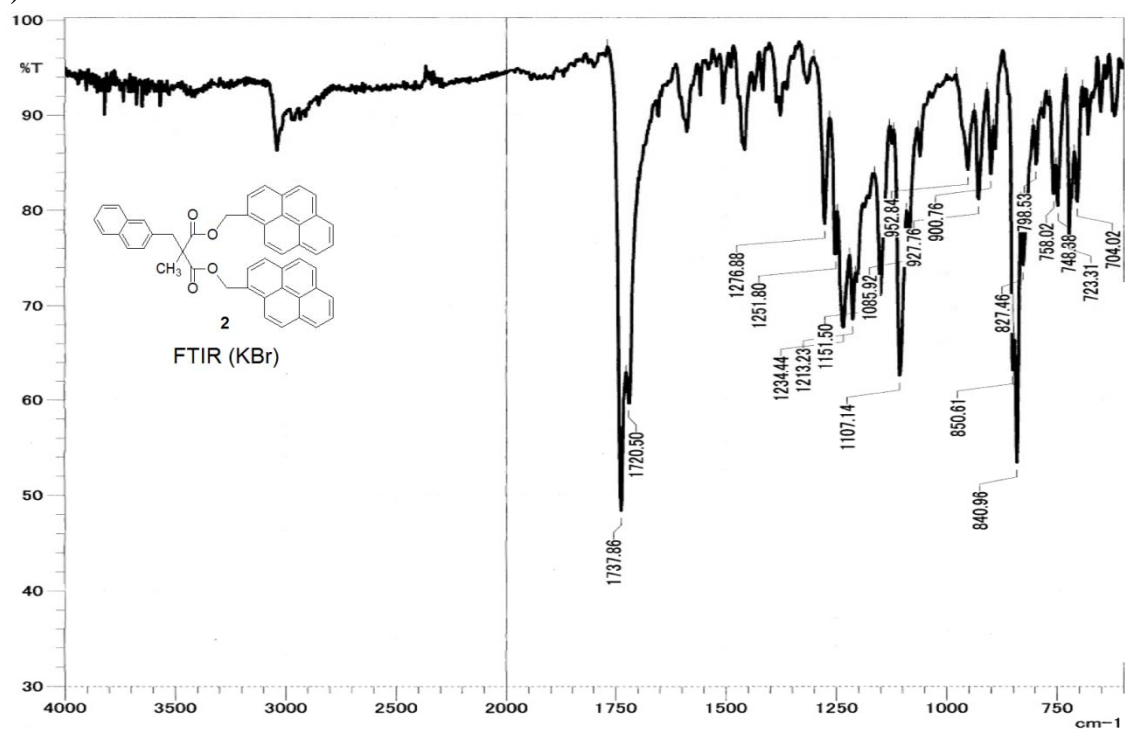

**Fig. S4** (a) <sup>1</sup>H NMR and (b) <sup>13</sup>C NMR spectra, (c) HRMS and (d) FT IR of bispyrenyl malonate **2**.
